# Supplementary material for: Pelajaran Mahal Minimnya Ruang Bermain
Source: Royal Society of Chemistry journal article supplement (doi:10.1039/d3dt02082g), 2007-01-01
Supplement: d3dt02082g1.pdf [file d3dt02082g1.pdf]

### Supporting Figure Captions

**Figure S1.** STEM-EDS spectrum with EDS mapping of Cu, Nb and O elements for 1wt% Cu/r-Nb<sub>2</sub>O<sub>5</sub> sample.

**Figure S2.** STEM-EDS spectrum with EDS mapping of Cu, Nb and O elements for 3wt% Cu/r-Nb<sub>2</sub>O<sub>5</sub> sample.

**Figure S3.** STEM-EDS spectrum with EDS mapping of Cu, Nb and O elements for 5wt% Cu/r-Nb<sub>2</sub>O<sub>5</sub> sample.

**Figure S4.** BET surface area of (A) pure Nb<sub>2</sub>O<sub>5</sub>, (B) r-Nb<sub>2</sub>O<sub>5</sub> and (C) 2wt% Cu/r-Nb<sub>2</sub>O<sub>5</sub> nanosheets.

**Figure S5.** The amount of photocatalytic products (H<sub>2</sub>, CO & CH<sub>4</sub>) evolved during CO<sub>2</sub> reduction for of pure Nb<sub>2</sub>O<sub>5</sub>, r-Nb<sub>2</sub>O<sub>5</sub>, 1wt% Cu/r-Nb<sub>2</sub>O<sub>5</sub>, 2wt% Cu/r-Nb<sub>2</sub>O<sub>5</sub>, 3wt% Cu/r-Nb<sub>2</sub>O<sub>5</sub>, 5wt% Cu/r-Nb<sub>2</sub>O<sub>5</sub> and 2wt% Cu/Nb<sub>2</sub>O<sub>5</sub> nanosheets.

**Figure S6.** Summary of Mott-Schottky results with flat band potential and charge carrier density.

**Table TS1.** Atomic weight% of Cu, Nb and O elements obtained from STEM-EDS analysis.

**Table TS2.** The obtained CO<sub>2</sub> selectivity for Nb<sub>2</sub>O<sub>5</sub>, reduced Nb<sub>2</sub>O<sub>5</sub>, 1wt% Cu/r-Nb<sub>2</sub>O<sub>5</sub>, 2wt% Cu/r-Nb<sub>2</sub>O<sub>5</sub>, 3wt% Cu/r-Nb<sub>2</sub>O<sub>5</sub>, 5wt% Cu/r-Nb<sub>2</sub>O<sub>5</sub> and 2wt% Cu/Nb<sub>2</sub>O<sub>5</sub> nanosheets.

**Table TS3.** Photocatalytic CO<sub>2</sub> reduction performance of present nanostructures compared to the Vanadate based photocatalyst with the reported photocatalysts.

**Table TS4.** Results obtained after CO<sub>2</sub> reduction tests for 10 consecutive cycles.

**Table TS5.** Summary of TRPL results for pure Nb<sub>2</sub>O<sub>5</sub>, r-Nb<sub>2</sub>O<sub>5</sub> and 2wt% Cu/r-Nb<sub>2</sub>O<sub>5</sub> nanosheets.

### Formula for charge carrier density (N<sub>D</sub>)

$$N_D = (2/e_0\epsilon\epsilon_0)/[d(1/C^2)/dV]$$

where  $e_0$ =electron charge,  $\epsilon$  = dielectric constant of Nb<sub>2</sub>O<sub>5</sub> (77) and  $V$  = applied potential

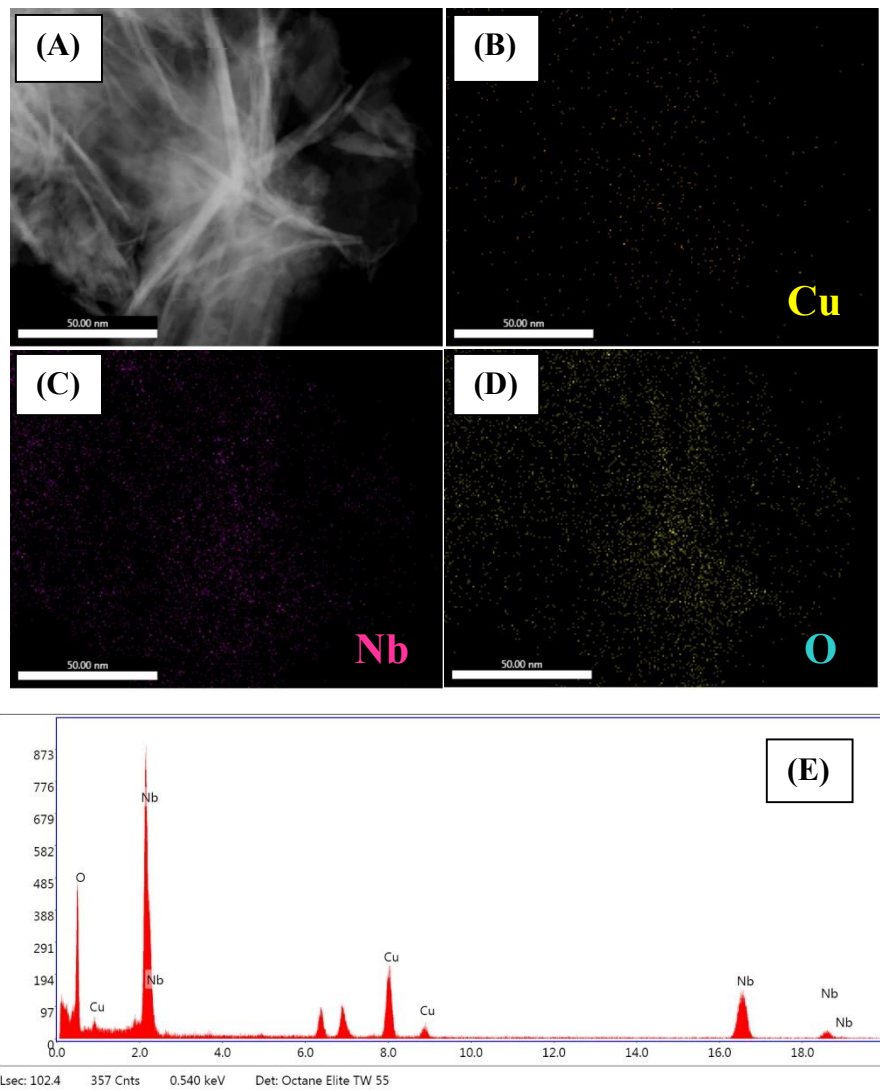

Figure S1

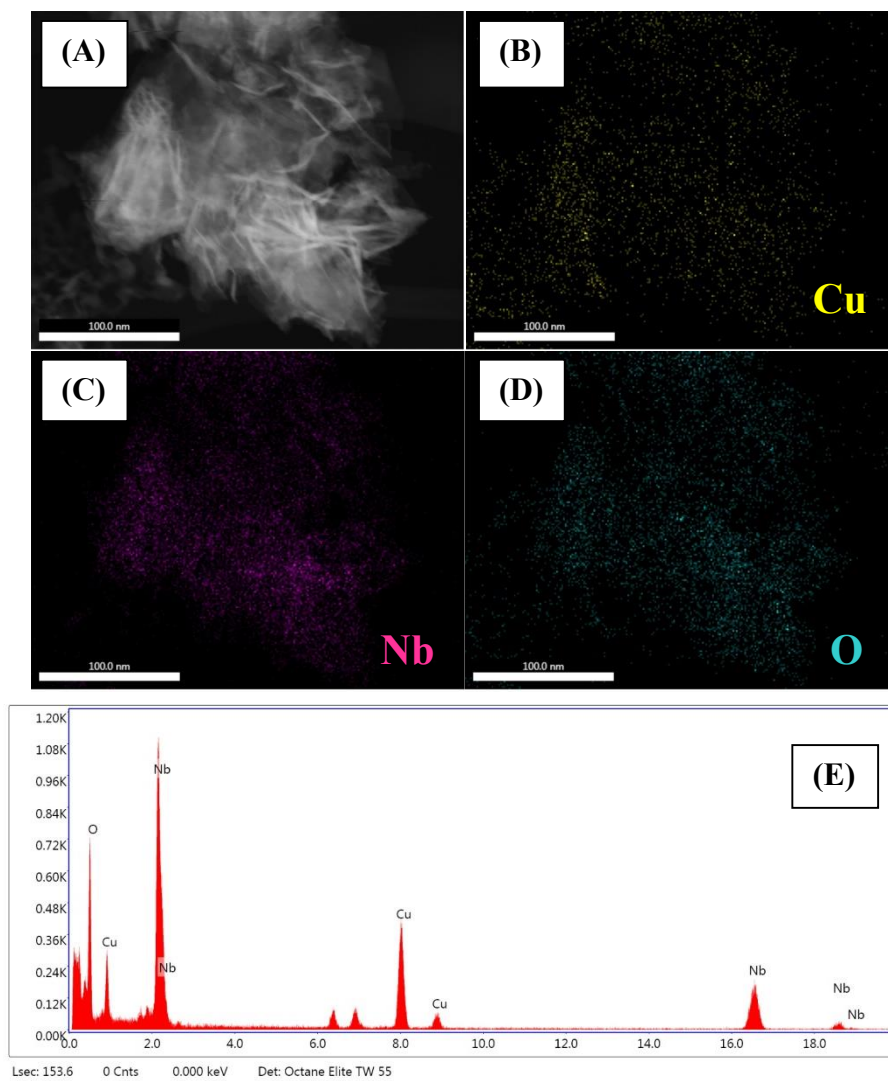

Figure S2

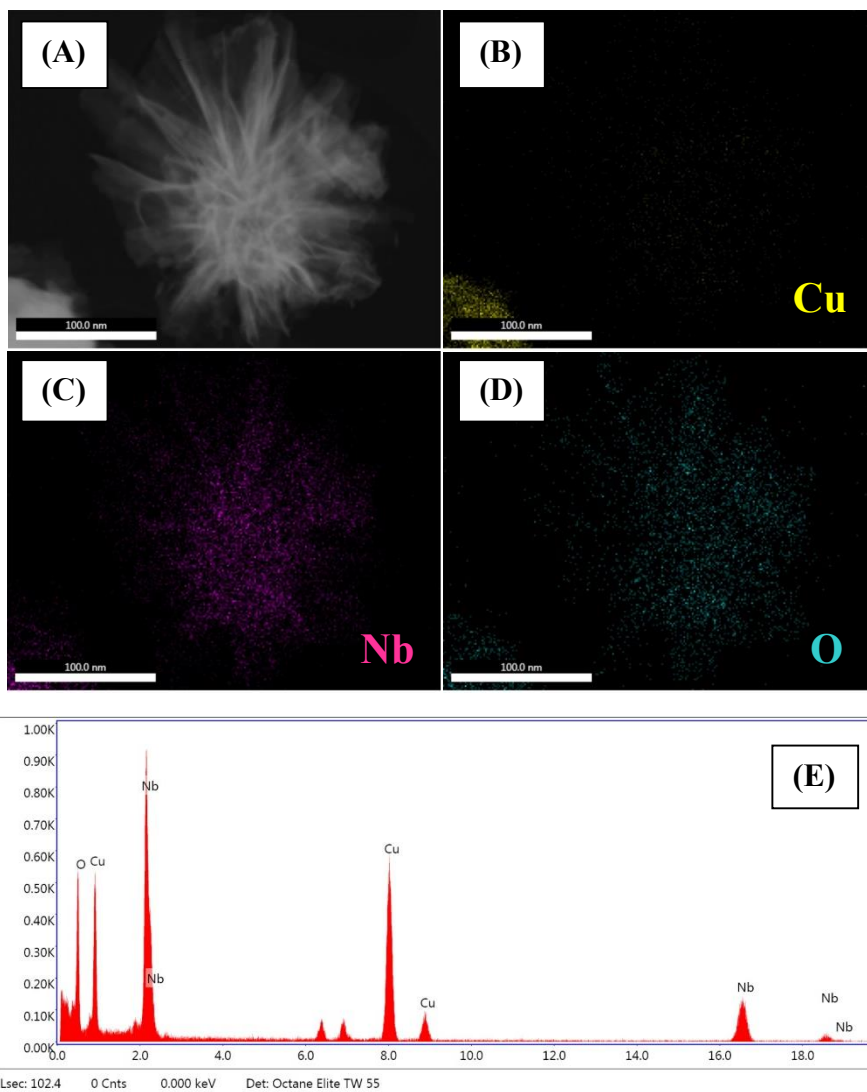

Figure S3

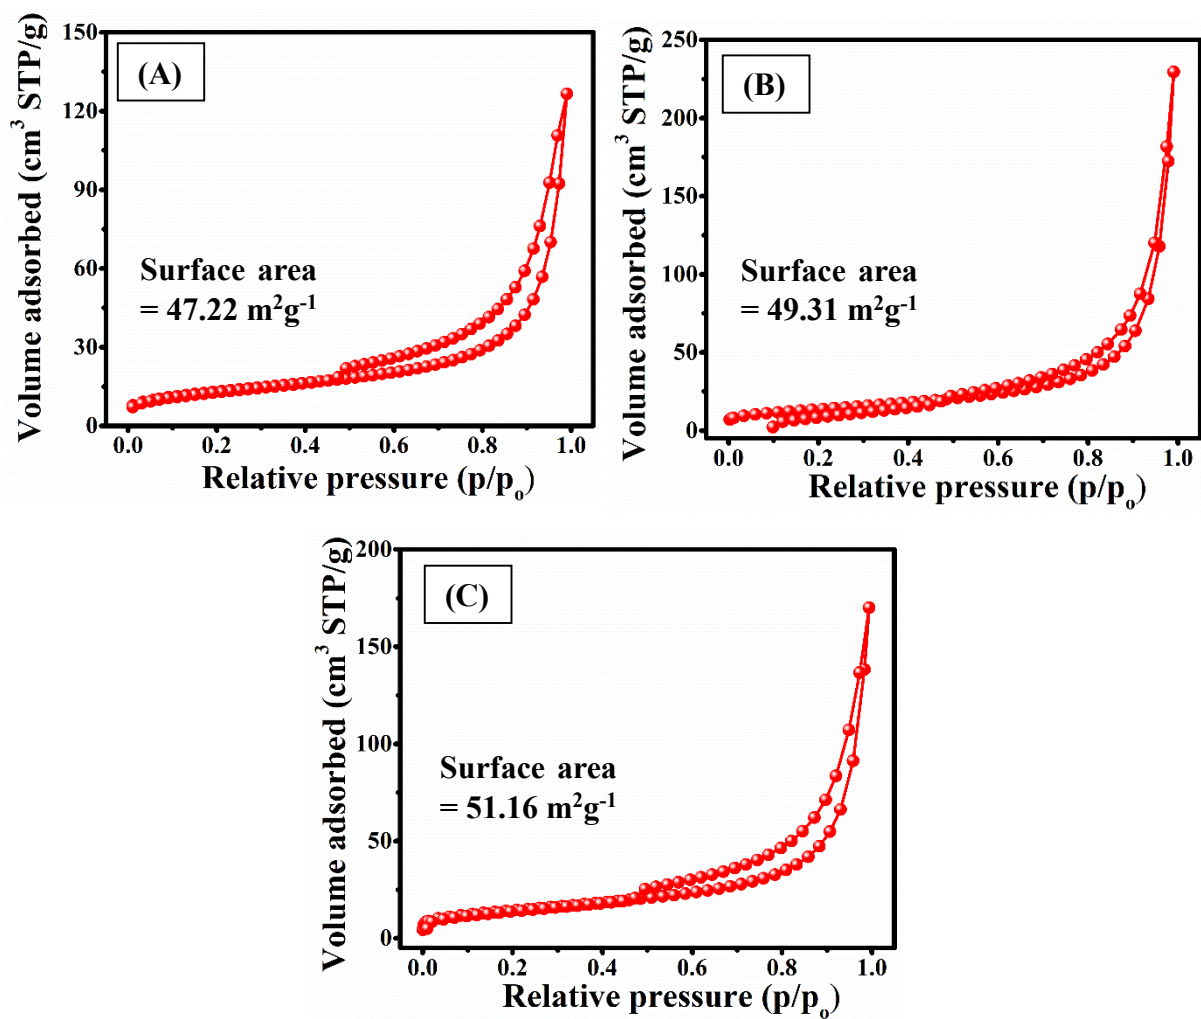

Figure S4(A to C)

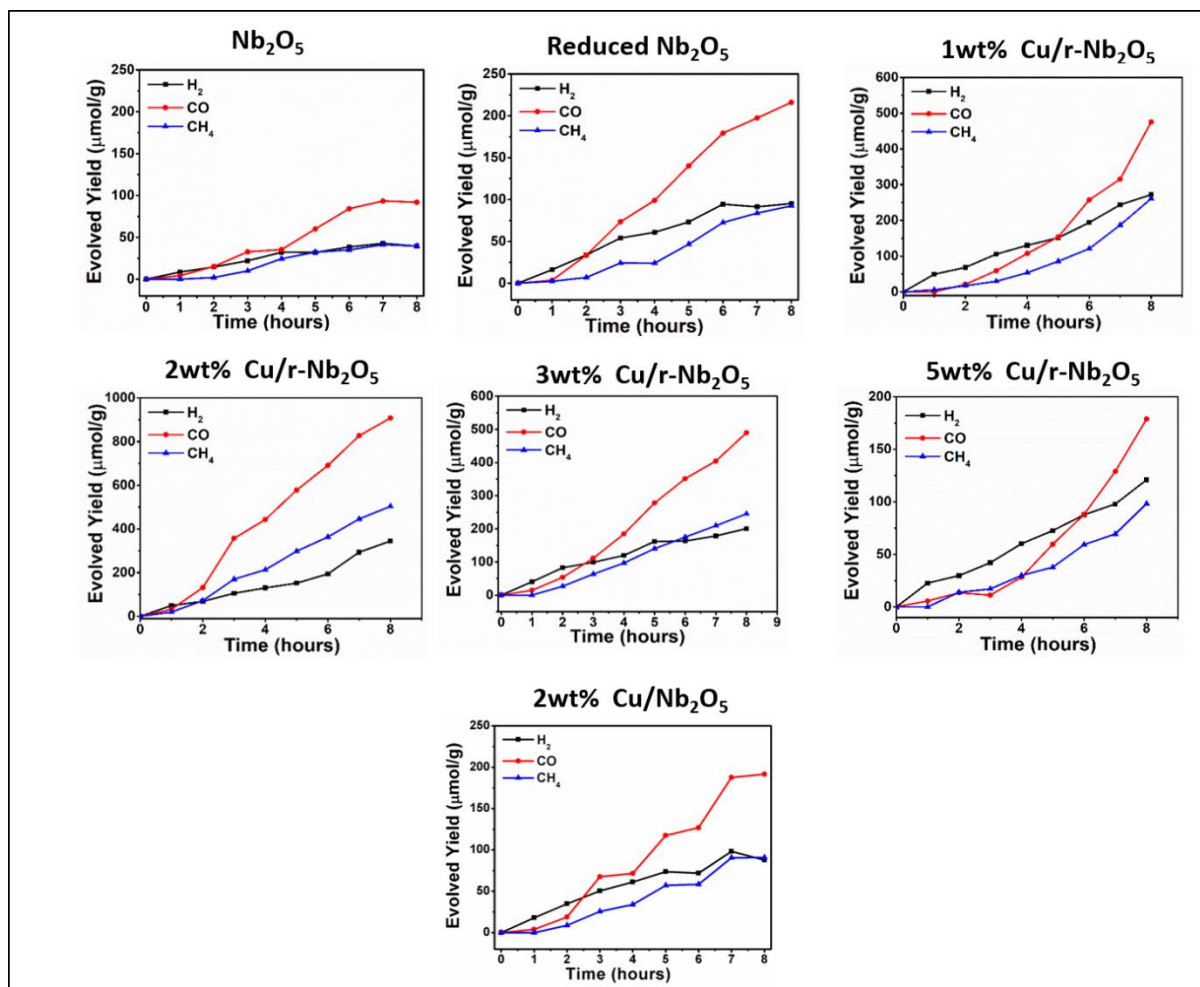

Figure S5

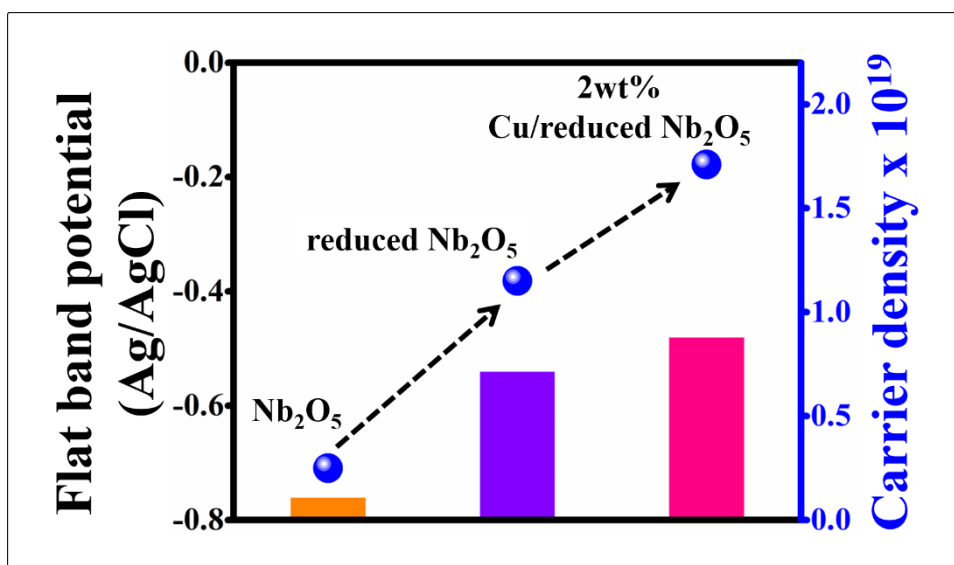

Figure S6

| <b>Sample Name</b>                       | <b>Cu<br/>(Atomic %)</b> | <b>Nb<br/>(Atomic %)</b> | <b>O<br/>(Atomic %)</b> |
|------------------------------------------|--------------------------|--------------------------|-------------------------|
| Nb <sub>2</sub> O <sub>5</sub>           | -                        | 55.39                    | 44.61                   |
| r-Nb <sub>2</sub> O <sub>5</sub>         | -                        | 73.57                    | 26.43                   |
| 1wt% Cu/r-Nb <sub>2</sub> O <sub>5</sub> | 0.94                     | 56.29                    | 42.77                   |
| 2wt% Cu/r-Nb <sub>2</sub> O <sub>5</sub> | 1.75                     | 58.85                    | 39.40                   |
| 3wt% Cu/r-Nb <sub>2</sub> O <sub>5</sub> | 6.62                     | 49.03                    | 44.35                   |
| 5wt% Cu/r-Nb <sub>2</sub> O <sub>5</sub> | 15.93                    | 46.57                    | 37.50                   |

**Table TS1**

| <b>Sr.<br/>No.</b> | <b>Sample Name</b>                       | <b>H<sub>2</sub><br/>(mmol/g)</b> | <b>CO<br/>(mmol/g)</b> | <b>CH<sub>4</sub><br/>(mmol/g)</b> | <b>Selectivity<br/>(%) S<sub>CO2</sub></b> |
|--------------------|------------------------------------------|-----------------------------------|------------------------|------------------------------------|--------------------------------------------|
| 1                  | Nb <sub>2</sub> O <sub>5</sub>           | 0.039                             | 0.092                  | 0.039                              | 86                                         |
| 2                  | r-Nb <sub>2</sub> O <sub>5</sub>         | 0.095                             | 0.216                  | 0.092                              | 86                                         |
| 3                  | 1wt% Cu/r-Nb <sub>2</sub> O <sub>5</sub> | 0.272                             | 0.475                  | 0.261                              | 85                                         |
| 4                  | 2wt% Cu/r-Nb <sub>2</sub> O <sub>5</sub> | 0.344                             | 0.908                  | 0.504                              | 89                                         |
| 5                  | 3wt% Cu/r-Nb <sub>2</sub> O <sub>5</sub> | 0.201                             | 0.490                  | 0.245                              | 88                                         |
| 6                  | 5wt% Cu/r-Nb <sub>2</sub> O <sub>5</sub> | 0.121                             | 0.179                  | 0.098                              | 83                                         |
| 7                  | 2wt% Cu/Nb <sub>2</sub> O <sub>5</sub>   | 0.087                             | 0.0192                 | 0.091                              | 86                                         |

**Table TS2**



| Sr. No. | Catalyst Name                                                                        | Products (mmol g <sup>-1</sup> )                                        | Experimental details                                                                        | Reference no.       |
|---------|--------------------------------------------------------------------------------------|-------------------------------------------------------------------------|---------------------------------------------------------------------------------------------|---------------------|
| 1       | 0.51wt% Cu/Nb <sub>2</sub> O <sub>5</sub>                                            | CO: 0.199, CH <sub>4</sub> : 0.419                                      | Catalyst amount: 0.1g, 6 UV lamps of 15 W                                                   | 30                  |
| 2       | Nb <sub>2</sub> O <sub>5</sub> /g-C <sub>3</sub> N <sub>4</sub>                      | CO: 0.343, CH <sub>4</sub> : 0.041                                      | Catalyst amount: 0.03g<br>300 W Xe lamp                                                     | 34                  |
| 3       | SiO <sub>2</sub> -HNb <sub>3</sub> O <sub>8</sub>                                    | CH <sub>4</sub> : 0.004                                                 | Catalyst amount: 0.1g, 0.4 wt % Pt<br>350 W Xe lamp, 34.8 mW cm <sup>-2</sup>               | 56                  |
| 4       | g-C <sub>3</sub> N <sub>4</sub> /NaNbO <sub>3</sub>                                  | CH <sub>4</sub> : 0.024                                                 | Catalyst amount: 0.05g + 0.5 wt % Pt 300-W Xe lamp, UV cutoff filter ( $\lambda > 420$ nm). | 57                  |
| 5       | 10wt% Cu/Nb <sub>2</sub> O <sub>5</sub>                                              | CH <sub>4</sub> : 0.048,<br>HCOOH: 0.074<br>CH <sub>3</sub> COOH: 0.007 | Catalyst amount: 0.3g<br>UVC lamp (OSRAM 11 W)<br>21.49 mW·cm <sup>-2</sup>                 | 58                  |
| 6       | Nb <sub>2</sub> O <sub>5</sub> nanofibers                                            | CO: 0.008,<br>CH <sub>4</sub> : 0.005                                   | Sample glass slide (2x2 cm)<br>18 W mercury lamp, 254 nm                                    | 59                  |
| 7       | Bi <sub>2</sub> O <sub>2</sub> (OH)(NO <sub>3</sub> )/Nb <sub>2</sub> O <sub>5</sub> | CO: 0.016,<br>C <sub>2</sub> H <sub>4</sub> : 0.006                     | UV-C irradiation (Philips 18 W mercury)                                                     | 60                  |
| 8       | Nb <sub>2</sub> O <sub>5</sub>                                                       | H <sub>2</sub> :0.039;<br>CO:0.092;<br>CH <sub>4</sub> :0.039           | Nanostructure grown on FTO substrate (4 cm x 2 cm)<br>300 W Xenon lamp                      | <b>Present work</b> |
|         | r-Nb <sub>2</sub> O <sub>5</sub>                                                     | H <sub>2</sub> :0.095;<br>CO:0.216;<br>CH <sub>4</sub> :0.092           |                                                                                             |                     |
|         | 2wt% Cu/r-Nb <sub>2</sub> O <sub>5</sub>                                             | H <sub>2</sub> :0.344;<br>CO:0.908;<br>CH <sub>4</sub> :0.503           |                                                                                             |                     |

**Table TS3**

| <b>Cycle number</b> | <b>H<sub>2</sub> (mmol/g)</b> | <b>CO (mmol/g)</b> | <b>CH<sub>4</sub> (mmol/g)</b> | <b>Selectivity (%)<br/>S<sub>CO2</sub></b> |
|---------------------|-------------------------------|--------------------|--------------------------------|--------------------------------------------|
| 1                   | 0.344                         | 0.908              | 0.504                          | 89                                         |
| 2                   | 0.374                         | 0.930              | 0.493                          | 88                                         |
| 3                   | 0.314                         | 0.938              | 0.460                          | 89                                         |
| 4                   | 0.330                         | 0.910              | 0.405                          | 88                                         |
| 5                   | 0.287                         | 0.923              | 0.422                          | 90                                         |
| 6                   | 0.389                         | 0.968              | 0.425                          | 87                                         |
| 7                   | 0.371                         | 0.938              | 0.506                          | 89                                         |
| 8                   | 0.321                         | 0.909              | 0.480                          | 89                                         |
| 9                   | 0.290                         | 0.799              | 0.481                          | 90                                         |
| 10                  | 0.256                         | 0.622              | 0.313                          | 88                                         |

**Table TS4**

| <b>Sample Name</b>                       | <b><math>\tau_1</math></b> | <b><math>\tau_2</math></b> | <b>B1</b> | <b>B2</b> | <b>Average carrier<br/>life time <math>\tau</math> (ns)</b> |
|------------------------------------------|----------------------------|----------------------------|-----------|-----------|-------------------------------------------------------------|
| Nb <sub>2</sub> O <sub>5</sub>           | 0.10                       | 0.35                       | 11        | 3.9       | 0.23                                                        |
| r-Nb <sub>2</sub> O <sub>5</sub>         | 0.14                       | 0.41                       | 12        | 3.3       | 0.26                                                        |
| 2wt% Cu/r-Nb <sub>2</sub> O <sub>5</sub> | 0.29                       | 3                          | 9.7       | 1.1       | 1.75                                                        |

**Table TS5**
